as well as providing education and training to ensure students are adequately prepared for these roles.

### 986 A Systematic Review of Medical Student Willingness to Volunteer and Preparedness for Pandemics and Disasters

M. Byrne<sup>1</sup>, J. Ashcroft<sup>1</sup>, L. Alexander<sup>2</sup>, J. Wan<sup>2</sup>, A. Harvey<sup>3</sup>

<sup>1</sup>University of Cambridge, Department of Surgery, Addenbrooke's Hospital, Cambridge, United Kingdom, <sup>2</sup>University of Cambridge, School of Clinical Medicine, Cambridge, United Kingdom, <sup>3</sup>King's College London, London, United Kingdom

**Introduction:** We aimed to identify motivators and barriers to volunteering during a disaster and knowledge and medical school curriculum of disaster and pandemic medicine.

**Method:** We systematically searched the literature on 28/6/2020, following PRISMA guidelines.

**Results:** A total of 37 studies met inclusion criteria including 11,168 medical students and 91 medical schools. 24 studies evaluated knowledge (64.9%), 16 evaluated volunteering (43.2%), and five evaluated medical school curricula (13.5%). Weighted mean willingness to volunteer during a disaster was 68.4% (SD = 21.7%, n = 2911), and there was a significant difference between those planning to volunteer and those who actually volunteered ( $P < .001$ ). We identified a number of modifiable barriers which may contribute to this difference. Overall, knowledge of disasters was poor with a weighted mean of 48.9% (SD = 15.1%, n = 2985).

**Conclusions:** There is a large number of students who are willing to volunteer during pandemics. However, they are likely to be under-prepared for these roles due to poor overall knowledge and limited teaching. During the current COVID-19 pandemic and in future disasters, medical students may be required to volunteer as auxiliary staff. Medical schools need to develop infrastructure to facilitate this process
